# Supplementary material for: High Metabolic Dependence on Oxidative Phosphorylation Drives Sensitivity to Metformin Treatment in MLL/AF9 Acute Myeloid Leukemia
Source: MDPI journal article supplement (doi:10.3390/cancers14030486), 2022-01-19
Supplement: s1 [file s1]

Supplementary Materials

# High Metabolic Dependence on Oxidative Phosphorylation Drives Sensitivity to Metformin Treatment in *MLL/AF9* Acute Myeloid Leukemia

Longlong Liu, Pradeep Kumar Patnana, Xiaoqing Xie, Daria Frank, Subbaiah Chary Nimmagadda, Annegret Rosemann, Marie Liebmann, Luisa Klotz, Bertram Opalka and Cyrus Khandanpour

**Table S1.** Information of cell lines used in the experiments.

| Name     | Database Name | Accession Numbers | Source               |
|----------|---------------|-------------------|----------------------|
| THP1     | DSMZ          | ACC 16            | Human (Homo sapiens) |
| MOLM13   | DSMZ          | ACC 305           | Human (Homo sapiens) |
| OCI/AML3 | DSMZ          | ACC 582           | Human (Homo sapiens) |
| HL60     | DSMZ          | ACC 3             | Human (Homo sapiens) |
| HEL      | DSMZ          | ACC 11            | Human (Homo sapiens) |
| KG1      | DSMZ          | ACC 14            | Human (Homo sapiens) |
| K562     | DSMZ          | ACC 10            | Human (Homo sapiens) |
| HEK293T  | DSMZ          | ACC 305           | Human (Homo sapiens) |

**Table S2.** Optimized cell numbers and inhibitor concentrations used in Seahorse Flux analyzer.

| Cell Type                          | Cells per well | Oligomycin | FCCP    | Rot/AA <sup>3</sup> | 2-DG   |
|------------------------------------|----------------|------------|---------|---------------------|--------|
| Human Cell lines <sup>1</sup>      | 100,000        | 1 µM       | 0.25 µM | 500 nM              | 500 nM |
| Murine HPC cells                   | 150,000        | 2 µM       | 2 µM    | 500 nM              | 500 nM |
| Murine leukemic cells <sup>2</sup> | 150,000        | 2 µM       | 2 µM    | 500 nM              | 500 nM |

<sup>1</sup> Including THP1, MOLM13, OCI/AML3, HL60, HEL, KG1, K562, K562TRBSR, HL60TRBSR; <sup>2</sup> c-kit+/GFP+ AML blast cells; <sup>3</sup> Rotenone and antimycin A.

**Table 3.** Supplement concentrations in Seahorse XF assay medium used for Seahorse analysis.

| Cell Type                         | Glucose | L-Glutamine | Sodium Pyruvate |
|-----------------------------------|---------|-------------|-----------------|
| Human Cell lines <sup>1</sup>     | 11.1 mM | 2 mM        | 0               |
| Murine primary cells <sup>2</sup> | 25 mM   | 4 mM        | 1 mM            |

<sup>1</sup> Including THP1, MOLM13, OCI/AML3, HL60, HEL, KG1, K562, K562TRBSR, HL60TRBSR; <sup>2</sup> Including murine HPCs and c-kit+/GFP+ AML blast cells.

**Table S4.** List of antibodies used for immunoblot.

| Antibody | Catalog No. | Supplier       |
|----------|-------------|----------------|
| NRF1     | 66832-1-Ig  | Proteintech    |
| PGC1a    | 66369-1-Ig  | Proteintech    |
| β-Actin  | 3700        | Cell Signaling |

**Table S5.** List of primers for the mtDNA measurement in real-time PCR.

| Name                       | Sequence (5' > 3')        | Application                              |
|----------------------------|---------------------------|------------------------------------------|
| Mus actB F                 | CGGCTTGCGGGTGTAAAAG       | Primers for murine mtDNA and nuclear DNA |
| Mus actB R                 | CGTGATCGTAGCGTCTGGTT      |                                          |
| Mus Cyt B F                | CTTCATGTCCGACGAGGCTTA     |                                          |
| Mus Cyt B R                | TGTGGCTATGACTGCGAACA      |                                          |
| Humo B2M F                 | TGCTGTCTCCATGTTTGATGTATCT | Primers for human mtDNA and nuclear DNA  |
| Humo B2M R                 | TCTCTGCTCCCCACCTCTAAGT    |                                          |
| Humo tRNA <sup>Leu</sup> F | CACCCAAGAACAGGGTTTGT      |                                          |

Humo tRNA<sup>Leu</sup> R

TGGCCATGGGTATGTTGTTA

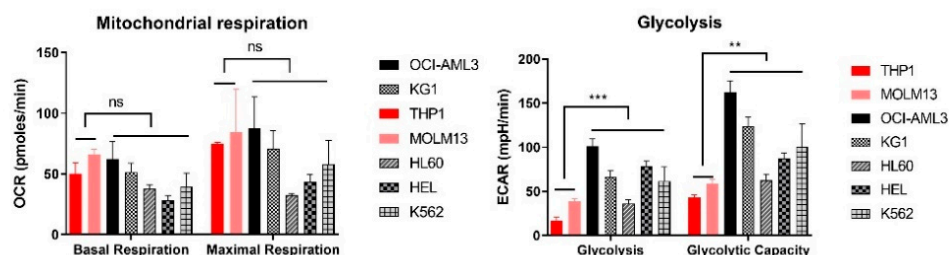

**Figure S1.** Metabolic phenotypes of human AML cell lines. Mitochondrial respiration (left) and glycolysis (right) were determined in various AML cell lines by Seahorse XFe96 Extracellular Flux Analyzer. Basal and maximum oxygen consumption rate (OCR) and extracellular acidification rate (ECAR) were measured. All data are expressed as the mean  $\pm$  standard deviation. \*  $p < 0.05$ ; \*\*  $p < 0.01$ ; \*\*\*  $p < 0.001$  (Student's *t*-test).

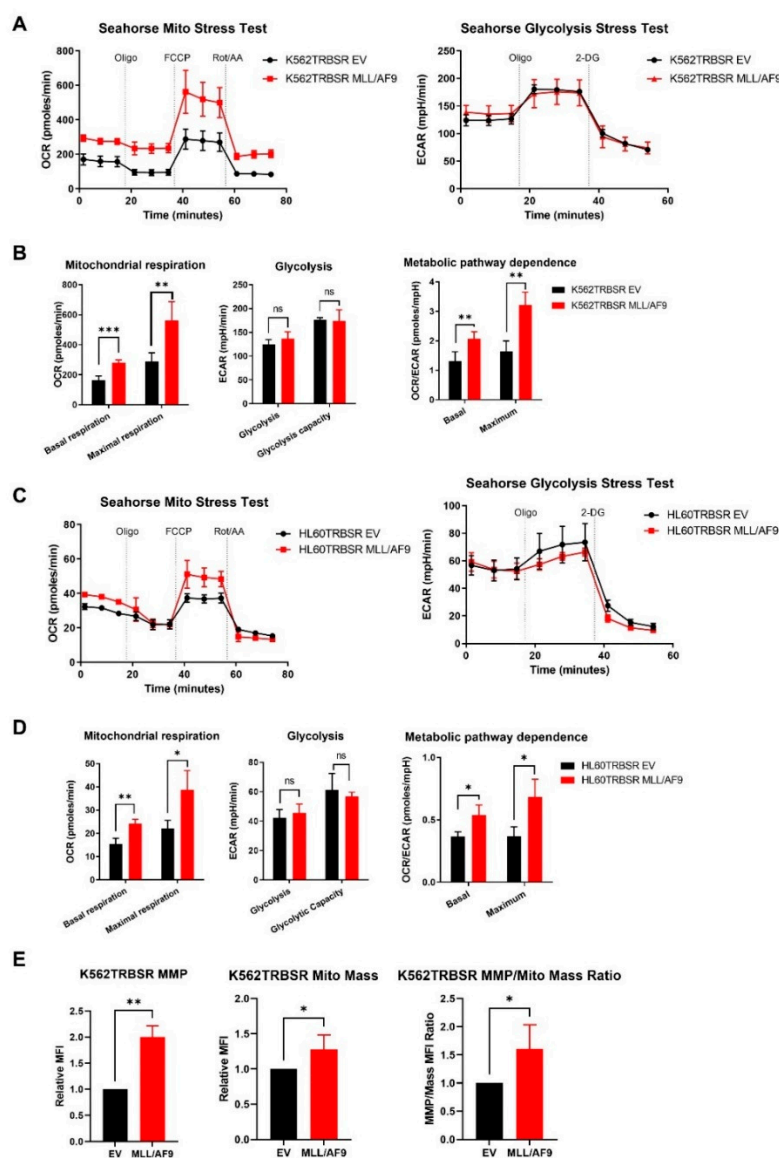

**Figure S2.** Metabolic phenotypes of K562TRBSR and HL60TRBSR with *MLL/AF9* fusion gene. (A,C) Seahorse Mito Stress Test and Glycolysis Stress Test were performed in human AML cell line

K562TRBSR and HL60TRBSR transduced with empty vector (EV) or *MLL/AF9* containing vectors. (B,D) Mitochondrial respiration, glycolysis and metabolic pathway dependence were calculated accordingly in K562TRBSR and HL60TRBSR cells with EV or *MLL/AF9*. (E) Mitochondrial membrane potential (MMP), mitochondrial number (mito mass), and MMP/mito mass ratio were determined by flow cytometry in K562TRBSR with EV or *MLL/AF9*. All data are expressed as the mean  $\pm$  standard deviation. \*  $p < 0.05$ ; \*\*  $p < 0.01$ ; \*\*\*  $p < 0.001$  (Student's *t*-test).

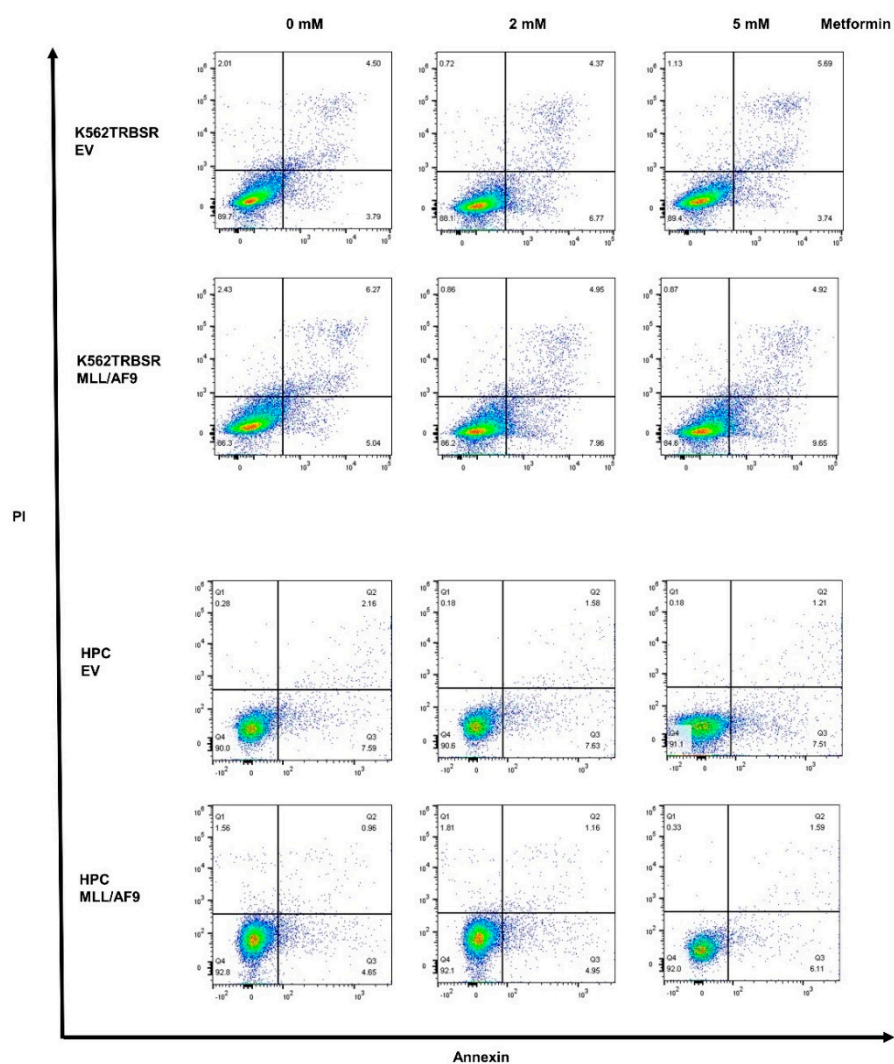

**Figure S3.** Apoptosis analysis of *MLL/AF9* cells treated with metformin. K562TRBSR cells and murine HPCs transduced with EV or *MLL/AF9* vector were treated with metformin for 48 h. and flow cytometry was performed to detect the apoptosis.

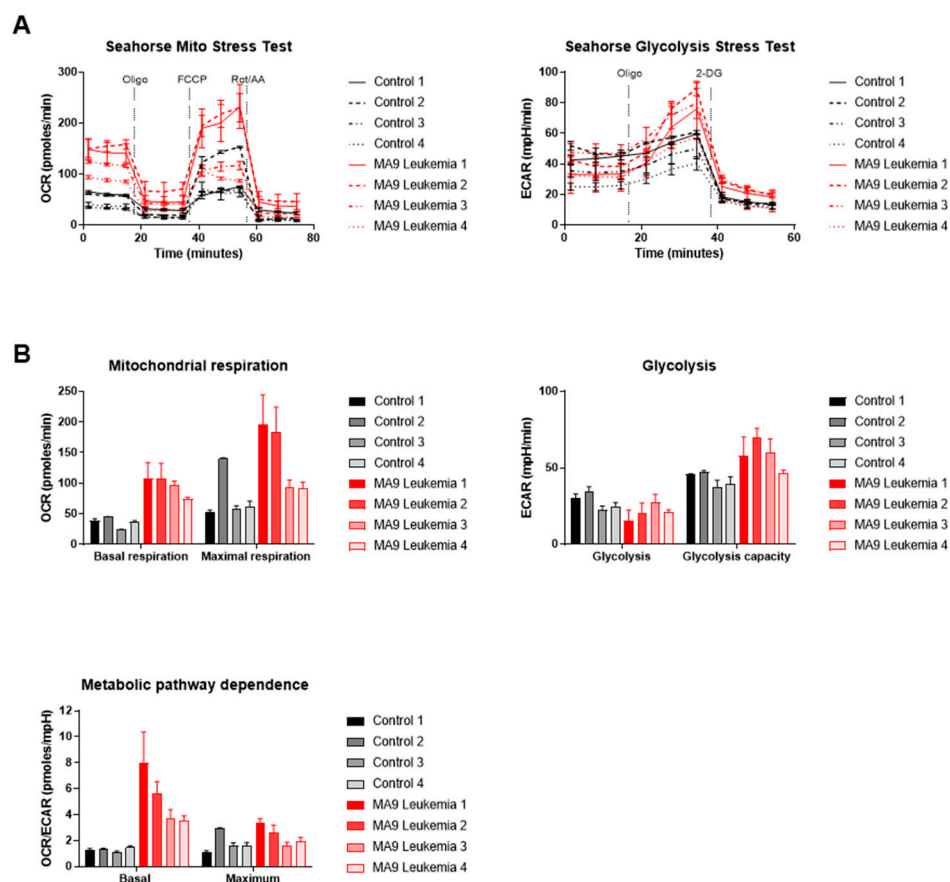

**Figure S4.** Metabolic profile of murine *MLL/AF9* AML cells. The experimental details of murine *MLL/AF9* AML model are described in Materials and Methods. **(A)** Seahorse Mito Stress Test and Glycolysis Stress Test were performed in c-kit+/GFP+ blast cells from *MLL/AF9* AML mice or c-kit+ HPCs from control mice. **(B)** Data for mitochondrial respiration, glycolysis and metabolic pathway dependence were calculated accordingly. All data are expressed as the mean  $\pm$  standard deviation.
